# Supplementary material for: Electrostatic Interactions Are the Primary Determinant of the Binding Affinity of SARS-CoV-2 Spike RBD to ACE2: A Computational Case Study of Omicron Variants
Source: MDPI journal article supplement (doi:10.3390/ijms232314796), 2022-11-26
Supplement: s1 [file s1]

# Electrostatic Interactions Are the Primary Determinant of the Binding Affinity of SARS-CoV-2 Spike RBD to ACE2: A Computational Case Study of Omicron Variants

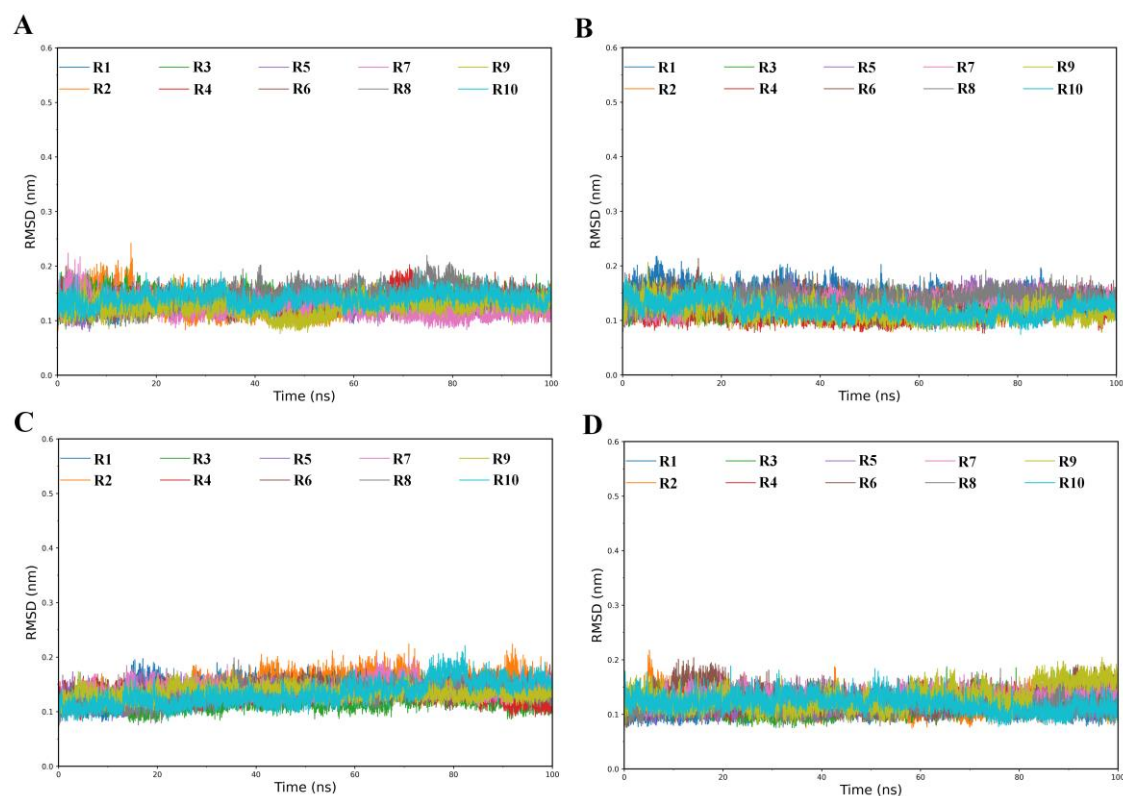

**Figure S1.** Time-dependent backbone RMSD values of RBD<sub>OMIS</sub> relative to the starting structures calculated from the 10 independent MD simulations replicas (R1-R10). (A) RBD<sub>BA.1</sub>. (B) RBD<sub>BA.2</sub>. (C) RBD<sub>BA.3</sub>. (D) RBD<sub>BA.4/5</sub>.

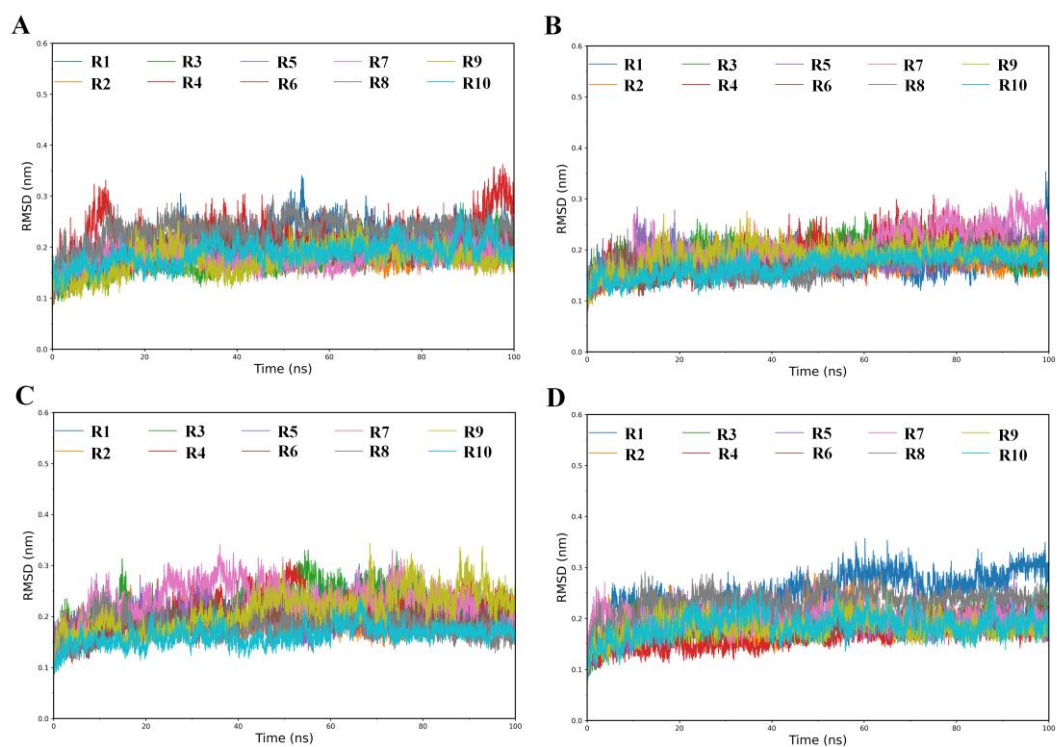

**Figure S2.** Time-dependent backbone RMSD values of ACE2 of RBD<sub>OMIS</sub>-ACE2 complexes relative to the starting structures calculated from the 10 independent MD simulations replicas (R1-R10). **(A)** ACE2<sub>BA.1</sub>. **(B)** ACE2<sub>BA.2</sub>. **(C)** ACE2<sub>BA.3</sub>. **(D)** ACE2<sub>BA.4/5</sub>.

**Table S1. The calculated binding free energy components (kcal/mol) of each replica (1-10) of each simulation system**

| WT                          | 1         | 2         | 3         | 4         | 5         | 6         | 7         | 8         | 9         | 10        |
|-----------------------------|-----------|-----------|-----------|-----------|-----------|-----------|-----------|-----------|-----------|-----------|
| $\Delta G_{\text{complex}}$ | -11067.12 | -11068.80 | -11077.98 | -11059.48 | -11109.32 | -11082.38 | -11052.48 | -11051.73 | -11063.46 | -11053.56 |
| $\Delta G_{\text{ACE2}}$    | -8600.64  | -8603.01  | -8604.08  | -8604.71  | -8639.70  | -8609.97  | -8567.48  | -8584.44  | -8588.56  | -8575.66  |
| $\Delta G_{\text{RBD}}$     | -2417.28  | -2430.00  | -2432.32  | -2413.96  | -2423.75  | -2432.16  | -2439.26  | -2424.48  | -2423.23  | -2425.77  |
| $\Delta G_{\text{binding}}$ | -49.20    | -35.80    | -41.58    | -40.81    | -45.87    | -40.25    | -45.74    | -42.81    | -51.67    | -52.13    |

| BA.1                        | 1         | 2         | 3         | 4         | 5         | 6         | 7         | 8         | 9         | 10        |
|-----------------------------|-----------|-----------|-----------|-----------|-----------|-----------|-----------|-----------|-----------|-----------|
| $\Delta G_{\text{complex}}$ | -11474.86 | -11513.08 | -11485.19 | -11463.29 | -11540.17 | -11471.95 | -11483.84 | -11463.42 | -11506.96 | -11502.85 |
| $\Delta G_{\text{ACE2}}$    | -8560.62  | -8610.19  | -8578.34  | -8565.63  | -8626.57  | -8578.18  | -8593.57  | -8569.45  | -8601.93  | -8586.26  |
| $\Delta G_{\text{RBD}}$     | -2845.16  | -2838.74  | -2837.33  | -2832.47  | -2848.65  | -2827.49  | -2824.28  | -2825.98  | -2842.48  | -2846.79  |
| $\Delta G_{\text{binding}}$ | -69.08    | -64.15    | -69.52    | -65.19    | -64.95    | -66.28    | -65.98    | -67.99    | -62.55    | -69.79    |

| BA.2                        | 1         | 2         | 3         | 4         | 5         | 6         | 7         | 8         | 9         | 10        |
|-----------------------------|-----------|-----------|-----------|-----------|-----------|-----------|-----------|-----------|-----------|-----------|
| $\Delta G_{\text{complex}}$ | -11481.57 | -11505.14 | -11533.75 | -11508.50 | -11526.37 | -11540.57 | -11503.02 | -11489.69 | -11471.09 | -11528.86 |
| $\Delta G_{\text{ACE2}}$    | -8573.36  | -8580.55  | -8630.48  | -8597.52  | -8626.23  | -8635.78  | -8612.76  | -8590.14  | -8566.48  | -8641.88  |
| $\Delta G_{\text{RBD}}$     | -2836.58  | -2855.66  | -2828.29  | -2843.20  | -2832.53  | -2828.14  | -2819.24  | -2829.86  | -2835.02  | -2820.43  |
| $\Delta G_{\text{binding}}$ | -71.63    | -68.93    | -74.99    | -67.78    | -67.60    | -76.64    | -71.03    | -69.70    | -69.59    | -66.55    |

| BA.3                        | 1         | 2         | 3         | 4         | 5         | 6         | 7         | 8         | 9         | 10        |
|-----------------------------|-----------|-----------|-----------|-----------|-----------|-----------|-----------|-----------|-----------|-----------|
| $\Delta G_{\text{complex}}$ | -11453.28 | -11488.23 | -11444.55 | -11423.93 | -11490.26 | -11481.64 | -11484.93 | -11493.33 | -11429.96 | -11451.42 |
| $\Delta G_{\text{ACE2}}$    | -8572.59  | -8592.52  | -8566.63  | -8537.38  | -8592.66  | -8595.85  | -8595.12  | -8617.16  | -8558.73  | -8588.91  |
| $\Delta G_{\text{RBD}}$     | -2810.29  | -2812.06  | -2796.32  | -2802.97  | -2813.05  | -2803.66  | -2822.58  | -2793.57  | -2787.09  | -2784.58  |
| $\Delta G_{\text{binding}}$ | -70.40    | -83.66    | -81.59    | -83.58    | -84.56    | -82.13    | -67.22    | -82.61    | -84.14    | -77.94    |

| BA.4/5                      | 1         | 2         | 3         | 4         | 5         | 6         | 7         | 8         | 9         | 10        |
|-----------------------------|-----------|-----------|-----------|-----------|-----------|-----------|-----------|-----------|-----------|-----------|
| $\Delta G_{\text{complex}}$ | -11244.78 | -11266.84 | -11203.28 | -11219.91 | -11262.32 | -11246.31 | -11221.65 | -11265.38 | -11229.36 | -11290.83 |
| $\Delta G_{\text{ACE2}}$    | -8575.99  | -8597.03  | -8550.16  | -8563.70  | -8602.27  | -8575.22  | -8568.01  | -8599.21  | -8574.57  | -8622.03  |
| $\Delta G_{\text{RBD}}$     | -2613.84  | -2616.50  | -2608.88  | -2605.20  | -2607.27  | -2623.48  | -2596.73  | -2610.44  | -2607.87  | -2615.62  |
| $\Delta G_{\text{binding}}$ | -54.96    | -53.30    | -44.24    | -51.02    | -52.78    | -47.61    | -56.91    | -55.73    | -46.93    | -53.18    |

**Note:**  $\Delta G_{\text{binding}} = \Delta G_{\text{complex}} - (\Delta G_{\text{ACE2}} + \Delta G_{\text{RBD}})$

**Table S2.** Residue contacts between RBD<sub>WT</sub> and ACE2.

| R1  | I1  | C1 | R2  | I2  | C2 | dCA     | OV | rCSU |
|-----|-----|----|-----|-----|----|---------|----|------|
| SER | 19  | A  | ALA | 475 | E  | 0.75229 |    | rCSU |
| GLN | 24  | A  | ALA | 475 | E  | 0.6113  | OV |      |
| GLN | 24  | A  | GLY | 476 | E  | 0.6489  | OV |      |
| GLN | 24  | A  | ASN | 487 | E  | 0.70125 | OV | rCSU |
| THR | 27  | A  | PHE | 456 | E  | 0.84427 | OV | rCSU |
| THR | 27  | A  | TYR | 473 | E  | 1.02857 | OV | rCSU |
| THR | 27  | A  | ALA | 475 | E  | 0.7051  | OV | rCSU |
| THR | 27  | A  | TYR | 489 | E  | 0.92876 | OV | rCSU |
| PHE | 28  | A  | TYR | 489 | E  | 0.88592 | OV |      |
| ASP | 30  | A  | LYS | 417 | E  | 1.09585 | OV | rCSU |
| ASP | 30  | A  | LEU | 455 | E  | 0.84261 | OV |      |
| ASP | 30  | A  | PHE | 456 | E  | 0.91076 | OV | rCSU |
| LYS | 31  | A  | LEU | 455 | E  | 0.80952 | OV | rCSU |
| LYS | 31  | A  | PHE | 456 | E  | 0.91202 | OV | rCSU |
| LYS | 31  | A  | TYR | 489 | E  | 0.79262 | OV | rCSU |
| LYS | 31  | A  | GLN | 493 | E  | 0.88441 | OV |      |
| HIS | 34  | A  | LEU | 455 | E  | 0.91561 | OV |      |
| HIS | 34  | A  | GLN | 493 | E  | 0.7895  | OV |      |
| GLU | 35  | A  | GLN | 493 | E  | 0.8442  | OV | rCSU |
| ASP | 38  | A  | TYR | 449 | E  | 1.06818 | OV | rCSU |
| ASP | 38  | A  | GLY | 496 | E  | 0.67724 | OV |      |
| TYR | 41  | A  | GLN | 498 | E  | 0.96852 | OV |      |
| TYR | 41  | A  | THR | 500 | E  | 1.0422  | OV | rCSU |
| TYR | 41  | A  | ASN | 501 | E  | 0.9389  | OV | rCSU |
| GLN | 42  | A  | GLY | 446 | E  | 0.76589 | OV | rCSU |
| GLN | 42  | A  | GLN | 498 | E  | 0.97889 | OV |      |
| LEU | 45  | A  | VAL | 445 | E  | 1.014   |    | rCSU |
| LEU | 45  | A  | GLN | 498 | E  | 1.03427 | OV | rCSU |
| LEU | 79  | A  | PHE | 486 | E  | 0.74839 | OV | rCSU |
| MET | 82  | A  | PHE | 486 | E  | 0.90662 | OV | rCSU |
| TYR | 83  | A  | PHE | 486 | E  | 1.0725  | OV |      |
| TYR | 83  | A  | ASN | 487 | E  | 1.06227 | OV | rCSU |
| ASN | 330 | A  | THR | 500 | E  | 0.74946 | OV |      |
| LYS | 353 | A  | GLY | 496 | E  | 0.96303 | OV | rCSU |
| LYS | 353 | A  | ASN | 501 | E  | 0.55088 | OV |      |
| LYS | 353 | A  | GLY | 502 | E  | 0.60388 | OV | rCSU |
| LYS | 353 | A  | TYR | 505 | E  | 0.57407 | OV | rCSU |
| GLY | 354 | A  | GLY | 502 | E  | 0.41146 | OV |      |
| GLY | 354 | A  | TYR | 505 | E  | 0.6621  | OV |      |
| ASP | 355 | A  | THR | 500 | E  | 0.66401 | OV |      |
| ASP | 355 | A  | ASN | 501 | E  | 0.52684 | OV |      |
| ARG | 357 | A  | THR | 500 | E  | 1.05413 | OV |      |
| GLN | 498 | E  | LYS | 353 | A  | 0.94004 |    | rCSU |
| PRO | 499 | E  | ASN | 330 | A  | 1.05902 |    | rCSU |
| THR | 500 | E  | LEU | 45  | A  | 0.95691 |    | rCSU |

**Note:** dCA is distance between C $\alpha$  atom centers (nm); R, I, C are residue name, residue index from PDB file, chain from PDB file, respectively; OV and rCSU represent overlap and repulsive contacts of structural units, respectively. A and E represent ACE2 and RBD<sub>WT</sub>, respectively.

**Table S3.** Residue contacts between RBD<sub>BA.1</sub> and ACE2.

| R1  | I1  | C1 | R2  | I2  | C2 | dCA     | OV | rCSU |
|-----|-----|----|-----|-----|----|---------|----|------|
| SER | 19  | A  | ALA | 475 | E  | 0.73257 |    | rCSU |
| SER | 19  | A  | ASN | 477 | E  | 0.76654 |    | rCSU |
| GLN | 24  | A  | ASN | 487 | E  | 0.68265 | OV |      |
| THR | 27  | A  | PHE | 456 | E  | 0.84041 | OV | rCSU |
| THR | 27  | A  | TYR | 473 | E  | 1.02576 | OV | rCSU |
| THR | 27  | A  | ALA | 475 | E  | 0.74016 | OV |      |
| THR | 27  | A  | TYR | 489 | E  | 0.89666 | OV | rCSU |
| PHE | 28  | A  | TYR | 489 | E  | 0.85576 | OV |      |
| ASP | 30  | A  | PHE | 456 | E  | 0.90331 | OV |      |
| LYS | 31  | A  | PHE | 456 | E  | 0.90805 | OV | rCSU |
| LYS | 31  | A  | TYR | 489 | E  | 0.77296 | OV | rCSU |
| LYS | 31  | A  | ARG | 493 | E  | 0.88681 | OV |      |
| HIS | 34  | A  | LEU | 455 | E  | 0.90829 | OV | rCSU |
| HIS | 34  | A  | ARG | 493 | E  | 0.79079 | OV | rCSU |
| GLU | 35  | A  | ARG | 493 | E  | 0.84311 | OV | rCSU |
| ASP | 38  | A  | TYR | 449 | E  | 1.07691 | OV | rCSU |
| ASP | 38  | A  | SER | 496 | E  | 0.68221 | OV | rCSU |
| ASP | 38  | A  | TYR | 501 | E  | 1.09515 |    | rCSU |
| TYR | 41  | A  | ARG | 498 | E  | 0.97618 | OV |      |
| TYR | 41  | A  | THR | 500 | E  | 1.03513 | OV | rCSU |
| TYR | 41  | A  | TYR | 501 | E  | 0.94865 | OV |      |
| GLN | 42  | A  | SER | 446 | E  | 0.76927 | OV | rCSU |
| GLN | 42  | A  | ARG | 498 | E  | 0.98681 | OV | rCSU |
| LEU | 45  | A  | VAL | 445 | E  | 1.02889 |    | rCSU |
| LEU | 45  | A  | ARG | 498 | E  | 1.04259 | OV |      |
| LEU | 45  | A  | THR | 500 | E  | 0.95    |    | rCSU |
| LEU | 79  | A  | PHE | 486 | E  | 0.76326 | OV | rCSU |
| MET | 82  | A  | PHE | 486 | E  | 0.8984  | OV | rCSU |
| TYR | 83  | A  | PHE | 486 | E  | 1.05541 | OV | rCSU |
| TYR | 83  | A  | ASN | 487 | E  | 1.06018 | OV | rCSU |
| ASN | 330 | A  | THR | 500 | E  | 0.75623 | OV | rCSU |
| LYS | 353 | A  | SER | 496 | E  | 0.96394 | OV | rCSU |
| LYS | 353 | A  | TYR | 501 | E  | 0.55955 | OV | rCSU |
| LYS | 353 | A  | GLY | 502 | E  | 0.6196  | OV | rCSU |
| LYS | 353 | A  | HIS | 505 | E  | 0.56904 | OV |      |
| GLY | 354 | A  | GLY | 502 | E  | 0.42931 | OV |      |
| GLY | 354 | A  | HIS | 505 | E  | 0.65534 | OV |      |
| ASP | 355 | A  | THR | 500 | E  | 0.6687  | OV |      |
| ARG | 357 | A  | THR | 500 | E  | 1.0601  | OV |      |
| ALA | 475 | E  | GLN | 24  | A  | 0.62967 |    | rCSU |
| PRO | 499 | E  | ASN | 330 | A  | 1.05954 |    | rCSU |

**Note:** dCA is distance between C $\alpha$  atom centers (nm); R, I, C are residue name, residue index from PDB file, chain from PDB file, respectively; OV and rCSU represent overlap and repulsive contacts of structural units, respectively. A and E represent ACE2 and RBD<sub>BA.1</sub>, respectively.

**Table S4.** Residue contacts between RBD<sub>BA.2</sub> and ACE2.

| R1  | I1  | C1 | R2  | I2  | C2 | dCA     | OV | rCSU |
|-----|-----|----|-----|-----|----|---------|----|------|
| SER | 19  | A  | ALA | 475 | E  | 0.7414  |    | rCSU |
| SER | 19  | A  | ASN | 477 | E  | 0.74397 |    | rCSU |
| THR | 27  | A  | PHE | 456 | E  | 0.84915 | OV | rCSU |
| THR | 27  | A  | ALA | 475 | E  | 0.7318  | OV | rCSU |
| THR | 27  | A  | TYR | 489 | E  | 0.9071  | OV | rCSU |
| PHE | 28  | A  | TYR | 489 | E  | 0.87132 | OV |      |
| ASP | 30  | A  | LEU | 455 | E  | 0.84207 | OV |      |
| ASP | 30  | A  | PHE | 456 | E  | 0.91235 | OV |      |
| LYS | 31  | A  | LEU | 455 | E  | 0.80869 | OV | rCSU |
| LYS | 31  | A  | PHE | 456 | E  | 0.91669 |    | rCSU |
| LYS | 31  | A  | TYR | 489 | E  | 0.7804  | OV | rCSU |
| LYS | 31  | A  | PHE | 490 | E  | 0.94887 |    | rCSU |
| LYS | 31  | A  | ARG | 493 | E  | 0.88059 | OV |      |
| HIS | 34  | A  | LEU | 455 | E  | 0.91361 | OV |      |
| HIS | 34  | A  | ARG | 493 | E  | 0.78516 | OV |      |
| GLU | 35  | A  | ARG | 493 | E  | 0.84314 | OV | rCSU |
| ASP | 38  | A  | TYR | 449 | E  | 1.07476 | OV | rCSU |
| ASP | 38  | A  | SER | 496 | E  | 0.67834 | OV | rCSU |
| ASP | 38  | A  | ARG | 498 | E  | 1.02157 |    | rCSU |
| TYR | 41  | A  | ARG | 498 | E  | 0.98166 | OV |      |
| TYR | 41  | A  | THR | 500 | E  | 1.01994 | OV | rCSU |
| TYR | 41  | A  | TYR | 501 | E  | 0.94538 | OV |      |
| GLN | 42  | A  | SER | 446 | E  | 0.77469 | OV | rCSU |
| GLN | 42  | A  | ARG | 498 | E  | 0.99069 | OV | rCSU |
| LEU | 45  | A  | VAL | 445 | E  | 1.02372 |    | rCSU |
| LEU | 45  | A  | ARG | 498 | E  | 1.04659 | OV |      |
| LEU | 45  | A  | THR | 500 | E  | 0.93795 |    | rCSU |
| LEU | 79  | A  | PHE | 486 | E  | 0.75704 | OV | rCSU |
| MET | 82  | A  | PHE | 486 | E  | 0.91149 | OV | rCSU |
| TYR | 83  | A  | PHE | 486 | E  | 1.06632 | OV |      |
| ASN | 330 | A  | THR | 500 | E  | 0.75875 | OV | rCSU |
| LYS | 353 | A  | SER | 496 | E  | 0.96094 | OV | rCSU |
| LYS | 353 | A  | TYR | 501 | E  | 0.55081 | OV |      |
| LYS | 353 | A  | GLY | 502 | E  | 0.62249 | OV | rCSU |
| LYS | 353 | A  | HIS | 505 | E  | 0.56394 | OV |      |
| GLY | 354 | A  | GLY | 502 | E  | 0.42915 | OV |      |
| GLY | 354 | A  | HIS | 505 | E  | 0.64695 | OV | rCSU |
| ASP | 355 | A  | THR | 500 | E  | 0.65862 | OV |      |
| ARG | 357 | A  | THR | 500 | E  | 1.05404 | OV |      |
| TYR | 473 | E  | THR | 27  | A  | 1.04115 |    | rCSU |
| ALA | 475 | E  | GLN | 24  | A  | 0.63172 |    | rCSU |
| PRO | 499 | E  | ASN | 330 | A  | 1.0525  |    | rCSU |

**Note:** dCA is distance between C $\alpha$  atom centers (nm); R, I, C are residue name, residue index from PDB file, chain from PDB file, respectively; OV and rCSU represent overlap and repulsive contacts of structural units, respectively. A and E represent ACE2 and RBD<sub>BA.2</sub>, respectively.

**Table S5.** Residue contacts between RBD<sub>BA.3</sub> and ACE2.

| R1  | I1  | C1 | R2  | I2  | C2 | dCA     | OV | rCSU |
|-----|-----|----|-----|-----|----|---------|----|------|
| SER | 19  | A  | ALA | 475 | E  | 0.76564 |    | rCSU |
| GLN | 24  | A  | ALA | 475 | E  | 0.58638 | OV |      |
| GLN | 24  | A  | GLY | 476 | E  | 0.6043  | OV |      |
| GLN | 24  | A  | ASN | 487 | E  | 0.71378 | OV | rCSU |
| THR | 27  | A  | PHE | 456 | E  | 0.85135 | OV | rCSU |
| THR | 27  | A  | TYR | 473 | E  | 1.01428 | OV | rCSU |
| THR | 27  | A  | ALA | 475 | E  | 0.66749 | OV | rCSU |
| THR | 27  | A  | TYR | 489 | E  | 0.93772 |    | rCSU |
| PHE | 28  | A  | TYR | 489 | E  | 0.89201 | OV |      |
| ASP | 30  | A  | PHE | 456 | E  | 0.91062 | OV | rCSU |
| LYS | 31  | A  | LEU | 455 | E  | 0.80797 | OV | rCSU |
| LYS | 31  | A  | PHE | 456 | E  | 0.91148 | OV | rCSU |
| LYS | 31  | A  | TYR | 489 | E  | 0.7919  | OV | rCSU |
| LYS | 31  | A  | PHE | 490 | E  | 0.9732  |    | rCSU |
| LYS | 31  | A  | ARG | 493 | E  | 0.8968  | OV | rCSU |
| HIS | 34  | A  | LEU | 455 | E  | 0.91069 | OV |      |
| HIS | 34  | A  | ARG | 493 | E  | 0.8047  | OV |      |
| GLU | 35  | A  | ARG | 493 | E  | 0.8558  | OV | rCSU |
| ASP | 38  | A  | TYR | 449 | E  | 1.07603 | OV | rCSU |
| ASP | 38  | A  | TYR | 501 | E  | 1.0922  | OV | rCSU |
| TYR | 41  | A  | ARG | 498 | E  | 0.95902 | OV |      |
| TYR | 41  | A  | THR | 500 | E  | 1.01586 | OV |      |
| TYR | 41  | A  | TYR | 501 | E  | 0.94683 | OV |      |
| GLN | 42  | A  | SER | 446 | E  | 0.77972 | OV | rCSU |
| LEU | 45  | A  | VAL | 445 | E  | 1.04234 |    | rCSU |
| LEU | 45  | A  | ARG | 498 | E  | 1.03044 | OV |      |
| LEU | 79  | A  | PHE | 486 | E  | 0.73951 | OV | rCSU |
| MET | 82  | A  | PHE | 486 | E  | 0.92858 | OV | rCSU |
| TYR | 83  | A  | PHE | 486 | E  | 1.09703 | OV | rCSU |
| TYR | 83  | A  | ASN | 487 | E  | 1.0637  | OV | rCSU |
| ASN | 330 | A  | THR | 500 | E  | 0.75914 | OV |      |
| LYS | 353 | A  | GLY | 496 | E  | 0.96315 | OV | rCSU |
| LYS | 353 | A  | TYR | 501 | E  | 0.5507  | OV | rCSU |
| LYS | 353 | A  | GLY | 502 | E  | 0.61642 | OV | rCSU |
| LYS | 353 | A  | HIS | 505 | E  | 0.56038 | OV | rCSU |
| GLY | 354 | A  | GLY | 502 | E  | 0.42252 | OV |      |
| GLY | 354 | A  | HIS | 505 | E  | 0.64782 | OV |      |
| ASP | 355 | A  | ARG | 498 | E  | 1.01039 | OV | rCSU |
| ASP | 355 | A  | THR | 500 | E  | 0.65501 | OV |      |
| ASP | 355 | A  | HIS | 505 | E  | 0.88167 | OV |      |
| ARG | 357 | A  | THR | 500 | E  | 1.05173 | OV |      |
| PHE | 486 | E  | PHE | 28  | A  | 0.88106 |    | rCSU |
| PRO | 499 | E  | ASN | 330 | A  | 1.05348 |    | rCSU |

**Note:** dCA is distance between C $\alpha$  atom centers (nm); R, I, C are residue name, residue index from PDB file, chain from PDB file, respectively; OV and rCSU represent overlap and repulsive contacts of structural units, respectively. A and E represent ACE2 and RBD<sub>BA.3</sub>, respectively.

**Table S6.** Residue contacts between RBD<sub>BA.4/5</sub> and ACE2.

| R1  | I1  | C1 | R2  | I2  | C2 | dCA     | OV | rCSU |
|-----|-----|----|-----|-----|----|---------|----|------|
| SER | 19  | A  | ALA | 475 | E  | 0.76123 |    | rCSU |
| SER | 19  | A  | ASN | 477 | E  | 0.69884 |    | rCSU |
| GLN | 24  | A  | GLY | 476 | E  | 0.65779 | OV |      |
| GLN | 24  | A  | ASN | 487 | E  | 0.71914 | OV | rCSU |
| THR | 27  | A  | PHE | 456 | E  | 0.84928 | OV | rCSU |
| THR | 27  | A  | ALA | 475 | E  | 0.70444 | OV | rCSU |
| THR | 27  | A  | TYR | 489 | E  | 0.93798 | OV | rCSU |
| PHE | 28  | A  | TYR | 489 | E  | 0.89614 | OV |      |
| ASP | 30  | A  | LEU | 455 | E  | 0.84233 | OV |      |
| ASP | 30  | A  | PHE | 456 | E  | 0.90955 | OV |      |
| LYS | 31  | A  | LEU | 455 | E  | 0.80545 | OV |      |
| LYS | 31  | A  | PHE | 456 | E  | 0.91015 | OV | rCSU |
| LYS | 31  | A  | TYR | 489 | E  | 0.80112 | OV | rCSU |
| LYS | 31  | A  | GLN | 493 | E  | 0.89182 | OV | rCSU |
| HIS | 34  | A  | LEU | 455 | E  | 0.9087  | OV |      |
| HIS | 34  | A  | GLN | 493 | E  | 0.79727 |    | rCSU |
| ASP | 38  | A  | TYR | 449 | E  | 1.07957 |    | rCSU |
| TYR | 41  | A  | ARG | 498 | E  | 0.97133 | OV |      |
| TYR | 41  | A  | THR | 500 | E  | 1.03272 | OV | rCSU |
| TYR | 41  | A  | TYR | 501 | E  | 0.9527  | OV |      |
| GLN | 42  | A  | GLY | 446 | E  | 0.80096 | OV | rCSU |
| GLN | 42  | A  | ARG | 498 | E  | 0.98389 |    | rCSU |
| LEU | 45  | A  | ARG | 498 | E  | 1.03826 | OV |      |
| LEU | 45  | A  | THR | 500 | E  | 0.94675 |    | rCSU |
| LEU | 79  | A  | VAL | 486 | E  | 0.77634 | OV | rCSU |
| MET | 82  | A  | VAL | 486 | E  | 0.94175 | OV | rCSU |
| TYR | 83  | A  | ASN | 487 | E  | 1.0827  | OV | rCSU |
| ASN | 330 | A  | THR | 500 | E  | 0.75205 | OV | rCSU |
| GLY | 352 | A  | HIS | 505 | E  | 0.94037 | OV |      |
| LYS | 353 | A  | GLY | 496 | E  | 0.96183 | OV | rCSU |
| LYS | 353 | A  | TYR | 501 | E  | 0.56043 | OV | rCSU |
| LYS | 353 | A  | GLY | 502 | E  | 0.6228  | OV | rCSU |
| LYS | 353 | A  | HIS | 505 | E  | 0.56175 | OV | rCSU |
| GLY | 354 | A  | GLY | 502 | E  | 0.42766 | OV |      |
| GLY | 354 | A  | HIS | 505 | E  | 0.64553 | OV |      |
| ASP | 355 | A  | THR | 500 | E  | 0.66401 | OV |      |
| ARG | 357 | A  | THR | 500 | E  | 1.05436 | OV |      |
| TYR | 473 | E  | THR | 27  | A  | 1.03366 |    | rCSU |
| PRO | 499 | E  | ASN | 330 | A  | 1.05474 |    | rCSU |

**Note:** dCA is distance between C $\alpha$  atom centers (nm); R, I, C are residue name, residue index from PDB file, chain from PDB file, respectively; OV and rCSU represent overlap and repulsive contacts of structural units, respectively. A and E represent ACE2 and RBD<sub>BA.4/5</sub>, respectively.



**Table S7.** Several quantity information in MD simulation setup.

| RBD-ACE2 | NNC <sup>a</sup> | NIN <sup>b</sup> |     | NWM <sup>c</sup> | EMS <sup>d</sup> |
|----------|------------------|------------------|-----|------------------|------------------|
|          |                  | NA               | CL  |                  |                  |
| WT       | -25              | 191              | 166 | 56056            | 1388             |
| BA.1     | -22              | 188              | 166 | 55983            | 1245             |
| BA.2     | -22              | 190              | 168 | 56472            | 1403             |
| BA.3     | -20              | 186              | 166 | 55985            | 1460             |
| BA.4/5   | -22              | 187              | 165 | 55649            | 1293             |

<sup>a</sup>Number of net charges.

<sup>b</sup>Number of ions.

<sup>c</sup>Number of water molecules.

<sup>d</sup>Number of energy minimization steps

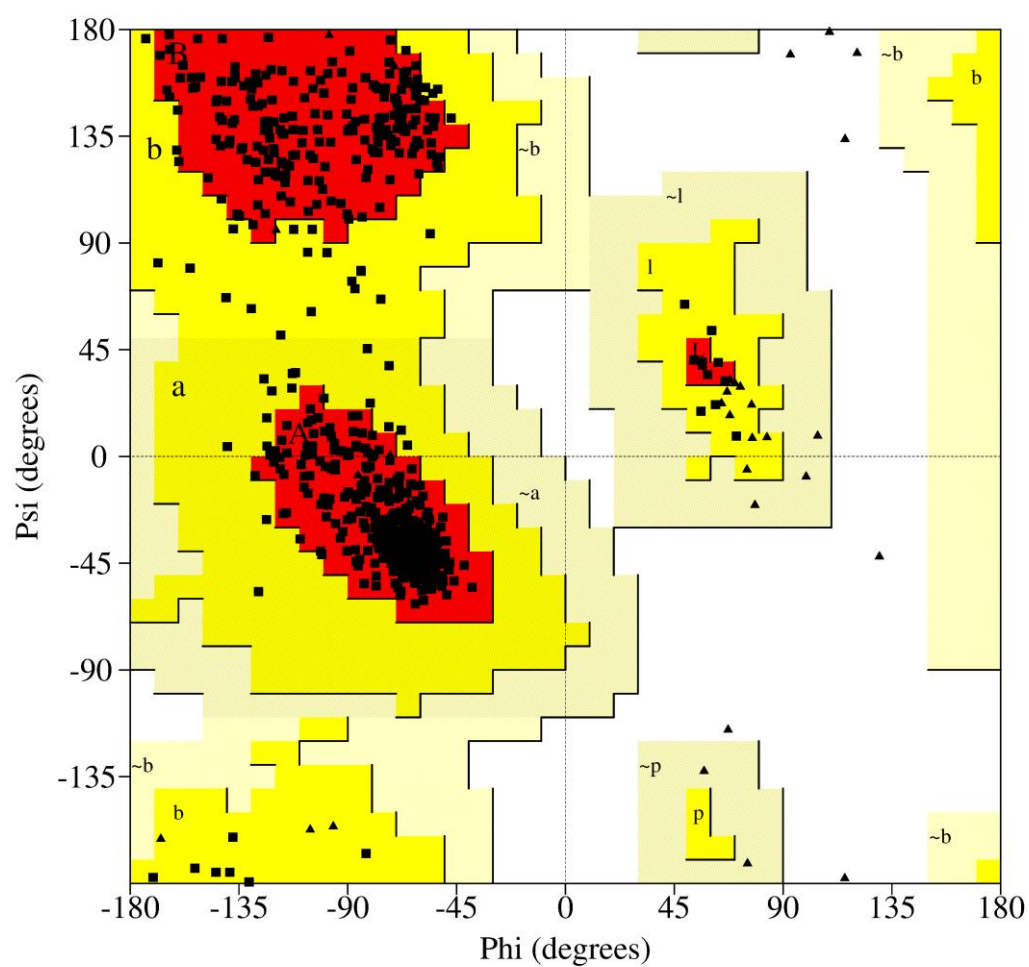

| Plot statistics                                      |     |        |
|------------------------------------------------------|-----|--------|
| Residues in most favoured regions [A,B,L]            | 650 | 92.3%  |
| Residues in additional allowed regions [a,b,l,p]     | 54  | 7.7%   |
| Residues in generously allowed regions [~a,~b,~l,~p] | 0   | 0.0%   |
| Residues in disallowed regions                       | 0   | 0.0%   |
| -----                                                |     |        |
| Number of non-glycine and non-proline residues       | 704 | 100.0% |
| Number of end-residues (excl. Gly and Pro)           | 3   |        |
| Number of glycine residues (shown as triangles)      | 47  |        |
| Number of proline residues                           | 37  |        |
| -----                                                |     |        |
| Total number of residues                             | 791 |        |

Based on an analysis of 118 structures of resolution of at least 2.0 Angstroms and R-factor no greater than 20%, a good quality model would be expected to have over 90% in the most favoured regions.

**Figure S3.** Ramachandran plot of RBD<sub>WT</sub>-ACE2 complex structure

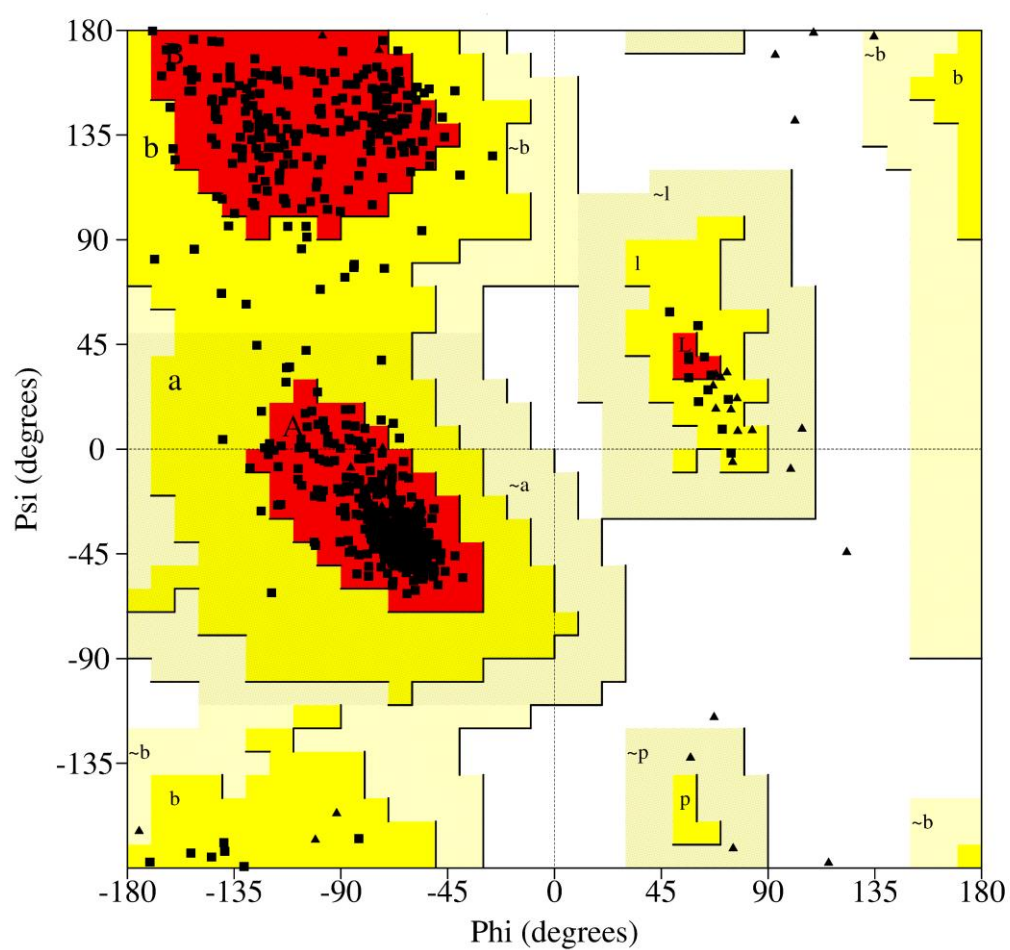

| Plot statistics                                      |     |        |
|------------------------------------------------------|-----|--------|
| Residues in most favoured regions [A,B,L]            | 652 | 92.4%  |
| Residues in additional allowed regions [a,b,l,p]     | 54  | 7.6%   |
| Residues in generously allowed regions [~a,~b,~l,~p] | 0   | 0.0%   |
| Residues in disallowed regions                       | 0   | 0.0%   |
| -----                                                |     |        |
| Number of non-glycine and non-proline residues       | 706 | 100.0% |
| Number of end-residues (excl. Gly and Pro)           | 3   |        |
| Number of glycine residues (shown as triangles)      | 44  |        |
| Number of proline residues                           | 38  |        |
| -----                                                |     |        |
| Total number of residues                             | 791 |        |

Based on an analysis of 118 structures of resolution of at least 2.0 Angstroms and R-factor no greater than 20%, a good quality model would be expected to have over 90% in the most favoured regions.

**Figure S4.** Ramachandran plot of RBD<sub>BA.1</sub>-ACE2 complex structure

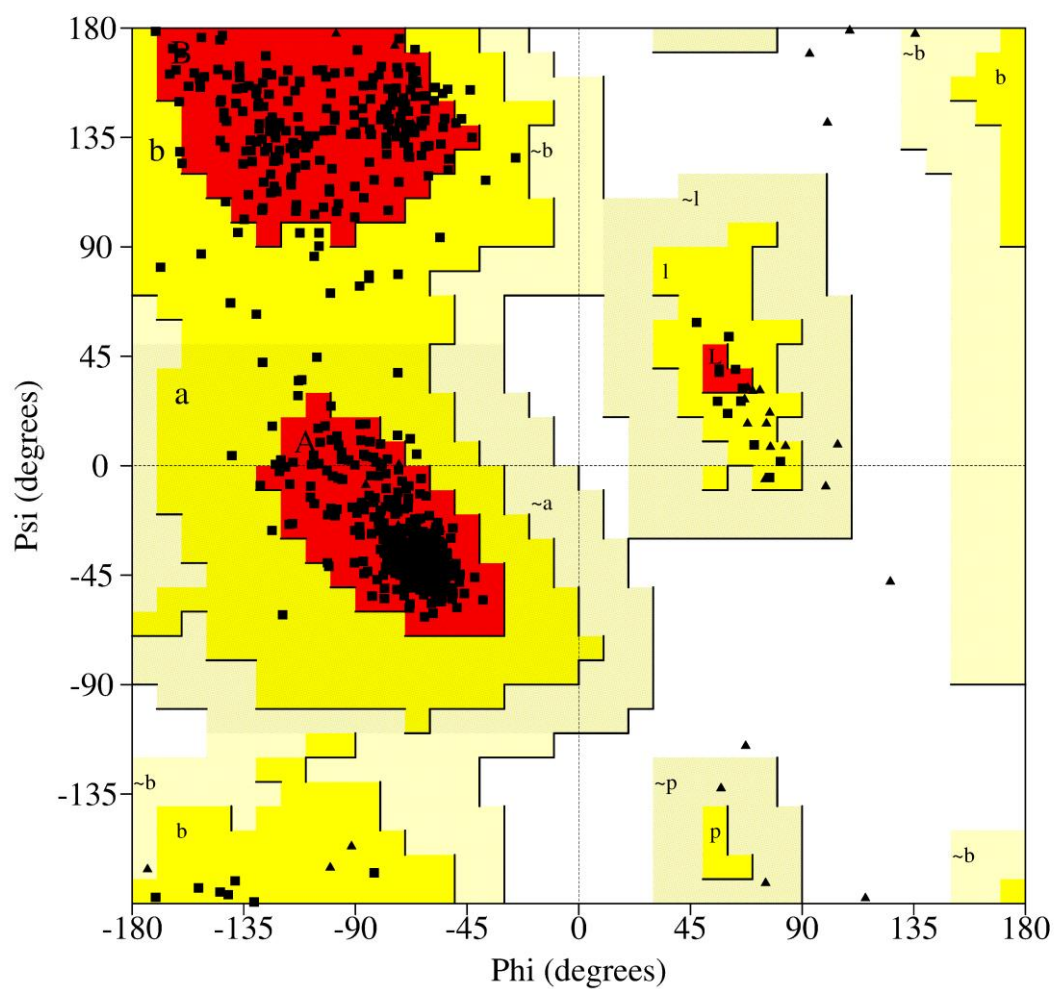

| Plot statistics                                      |     |        |
|------------------------------------------------------|-----|--------|
| Residues in most favoured regions [A,B,L]            | 649 | 91.9%  |
| Residues in additional allowed regions [a,b,l,p]     | 57  | 8.1%   |
| Residues in generously allowed regions [~a,~b,~l,~p] | 0   | 0.0%   |
| Residues in disallowed regions                       | 0   | 0.0%   |
| -----                                                |     |        |
| Number of non-glycine and non-proline residues       | 706 | 100.0% |
| Number of end-residues (excl. Gly and Pro)           | 3   |        |
| Number of glycine residues (shown as triangles)      | 44  |        |
| Number of proline residues                           | 38  |        |
| -----                                                |     |        |
| Total number of residues                             | 791 |        |

Based on an analysis of 118 structures of resolution of at least 2.0 Angstroms and R-factor no greater than 20%, a good quality model would be expected to have over 90% in the most favoured regions.

**Figure S5.** Ramachandran plot of RBD<sub>BA.2</sub>-ACE2 complex structure

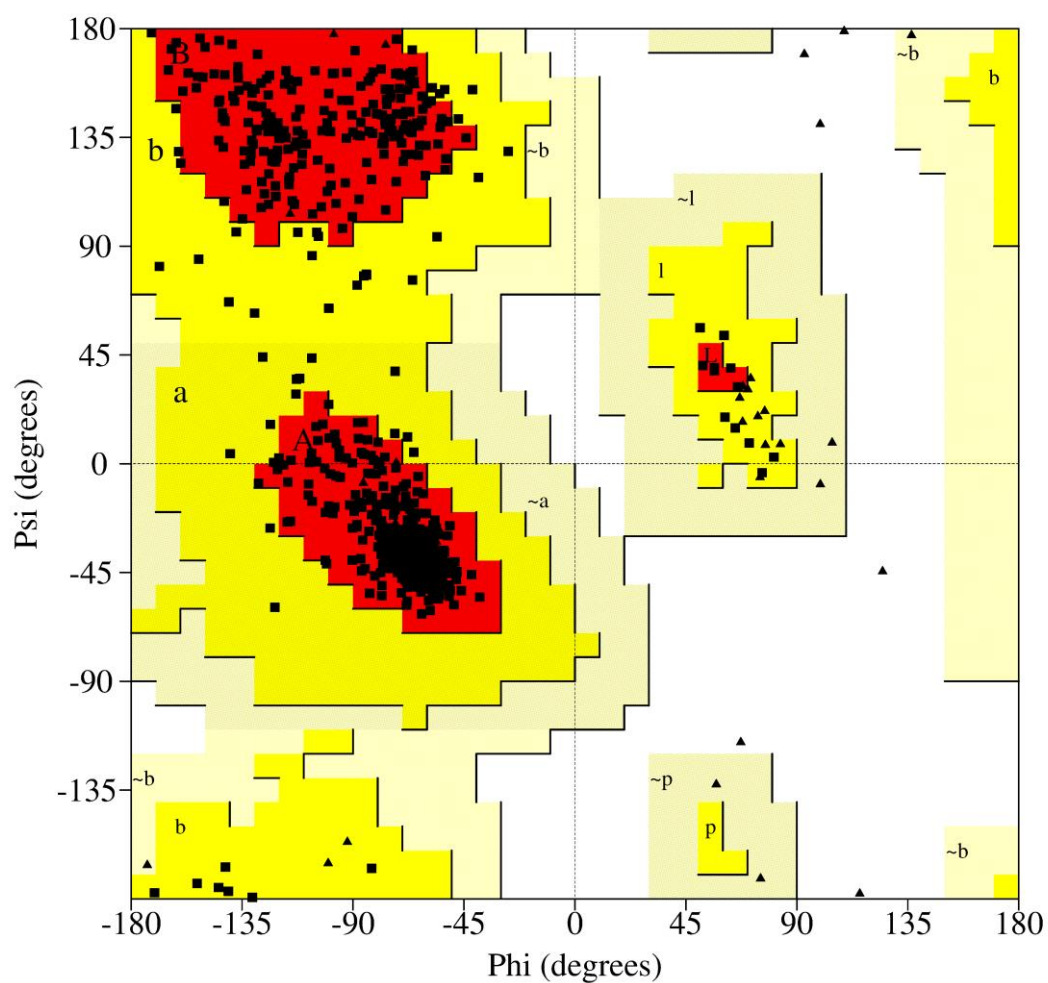

| Plot statistics                                      |     |        |
|------------------------------------------------------|-----|--------|
| Residues in most favoured regions [A,B,L]            | 650 | 92.2%  |
| Residues in additional allowed regions [a,b,l,p]     | 55  | 7.8%   |
| Residues in generously allowed regions [~a,~b,~l,~p] | 0   | 0.0%   |
| Residues in disallowed regions                       | 0   | 0.0%   |
| -----                                                |     |        |
| Number of non-glycine and non-proline residues       | 705 | 100.0% |
| Number of end-residues (excl. Gly and Pro)           | 3   |        |
| Number of glycine residues (shown as triangles)      | 45  |        |
| Number of proline residues                           | 38  |        |
| -----                                                |     |        |
| Total number of residues                             | 791 |        |

Based on an analysis of 118 structures of resolution of at least 2.0 Angstroms and R-factor no greater than 20%, a good quality model would be expected to have over 90% in the most favoured regions.

**Figure S6.** Ramachandran plot of RBD<sub>BA.3</sub>-ACE2 complex structure



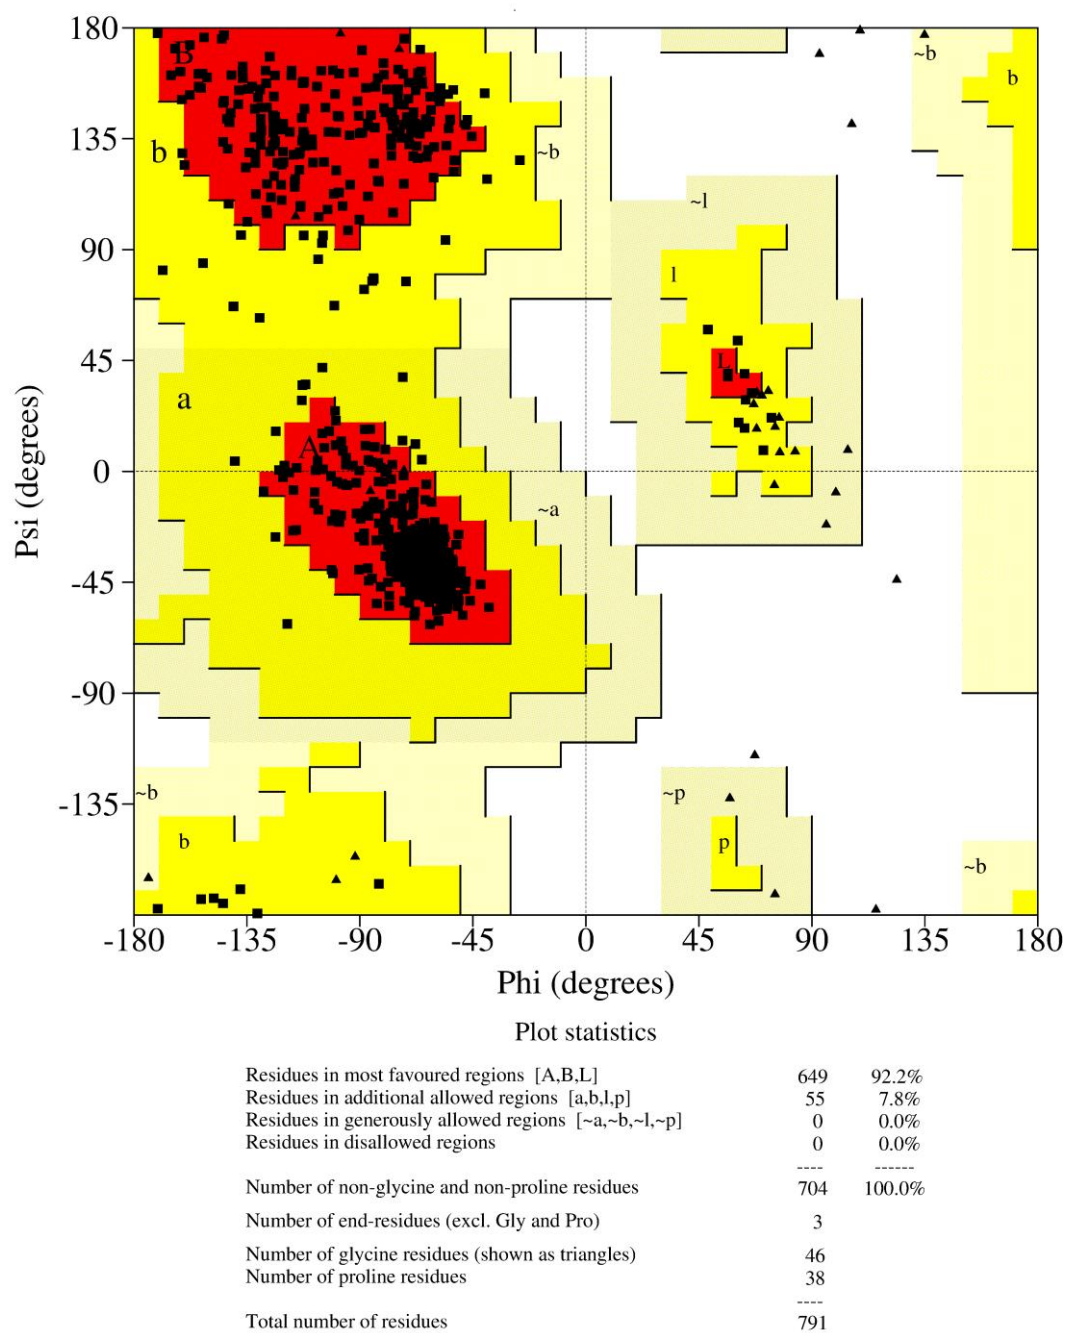

Based on an analysis of 118 structures of resolution of at least 2.0 Angstroms and R-factor no greater than 20%, a good quality model would be expected to have over 90% in the most favoured regions.

**Figure S7.** Ramachandran plot of RBD<sub>BA.4/5</sub>-ACE2 complex structure
